# Supplementary material for: Deciphering Metabolic Pathways in High-Seeding-Density Fed-Batch Processes for Monoclonal Antibody Production: A Computational Modeling Perspective
Source: MDPI journal article supplement (doi:10.3390/bioengineering11040331), 2024-03-28
Supplement: s1 [file s1]

**Table S4.** List of ordinary differential equations and rate expressions for the three distinct models

| ODE/rate expression                                                                                                                                                                                                                        |      |
|--------------------------------------------------------------------------------------------------------------------------------------------------------------------------------------------------------------------------------------------|------|
| <b>Model 1</b>                                                                                                                                                                                                                             |      |
| $\frac{dbiomass}{dt} = v_1 \cdot biomass - k_d \cdot biomass - D \cdot biomass,$                                                                                                                                                           | (1)  |
| $\frac{dAb}{dt} = v_2 - D \cdot Ab,$                                                                                                                                                                                                       | (2)  |
| $\frac{dpyr}{dt} = -2.534 \cdot v_1 - 8.560 \cdot v_2 + 2 \cdot v_3 - v_4 + v_{10} - v_{11} + D \cdot (pyr_i - pyr),$                                                                                                                      | (3)  |
| $\frac{dglc}{dt} = -0.355 \cdot v_1 - v_3 - v_7 - m \cdot biomass + D \cdot (glc_i - glc),$                                                                                                                                                | (4)  |
| $\frac{dlac}{dt} = v_4 + D \cdot (lac_i - lac),$                                                                                                                                                                                           | (5)  |
| $\frac{dnh4}{dt} = -1.384 \cdot v_1 - 22.890 \cdot v_2 + v_5 + v_{10} + D \cdot (nh4_i - nh4),$                                                                                                                                            | (6)  |
| $\frac{dasn}{dt} = -0.260 \cdot v_1 - 3.970 \cdot v_2 - v_5 + D \cdot (asn_i - asn),$                                                                                                                                                      | (7)  |
| $\frac{dasp}{dt} = -0.398 \cdot v_1 - 3.460 \cdot v_2 + v_5 - v_6 + D \cdot (asp_i - asp),$                                                                                                                                                | (8)  |
| $\frac{dglu}{dt} = -2.834 \cdot v_1 - 62.060 \cdot v_2 + v_6 - 2 \cdot v_7 + v_8 + v_9 + v_{11} + D \cdot (glu_i - glu),$                                                                                                                  | (9)  |
| $\frac{dile}{dt} = -0.278 \cdot v_1 - 2.500 \cdot v_2 - v_8 + D \cdot (ile_i - ile),$                                                                                                                                                      | (10) |
| $\frac{dleu}{dt} = -0.540 \cdot v_1 - 7.660 \cdot v_2 - v_9 + D \cdot (leu_i - leu),$                                                                                                                                                      | (11) |
| $\frac{dser}{dt} = -1.600 \cdot v_1 - 23.260 \cdot v_2 + 2 \cdot v_7 - v_{10} + D \cdot (ser_i - ser)$                                                                                                                                     | (12) |
| $\frac{dV}{dt} = F_{in} - F_{out}$                                                                                                                                                                                                         | (13) |
| $v_1 = v_{max,1} \cdot \frac{pyr}{K_{mpyr1} + pyr} \cdot \frac{glu}{K_{mglu1} + glu} \cdot \frac{asn}{K_{masn1} + asn} \cdot \frac{glc}{K_{mglc1} + glc} \cdot \frac{K_{dlac1}}{K_{dlac1} + lac} \cdot \frac{K_{dnh41}}{K_{dnh41} + nh4'}$ | (14) |
| $v_2 = a_2 \cdot biomass + b_2 \cdot v_1 \cdot biomass,$                                                                                                                                                                                   | (15) |
| $v_3 = v_{max,3} \cdot \frac{glc}{K_{mglc3} + glc} \cdot \frac{asn}{K_{masn3} + asn} + v_{3,base},$                                                                                                                                        | (16) |
| $v_4 = v_{max,4f} \cdot \frac{pyr}{K_{mpyr4} + pyr} \cdot \frac{1}{1 + \left(\frac{lac}{K_{ilac4}}\right)^{Y_4}} - v_{max,4r} \cdot \frac{lac}{K_{mlac4} + lac} \cdot \frac{1}{v_3},$                                                      | (17) |
| $v_5 = v_{max,5f} \cdot \frac{asn}{K_{masn5} + asn} - v_{max,5r} \cdot \frac{asp}{K_{masp5} + asp} \cdot \frac{nh4}{K_{mnh45} + nh4'}$                                                                                                     | (18) |
| $v_6 = v_{max,6f} \cdot \frac{asp}{K_{masp6} + asp} - v_{max,6r} \cdot \frac{glu}{K_{mglu6} + glu},$                                                                                                                                       | (19) |
| $v_7 = v_{max,7} \cdot \frac{glu}{K_{mglu7} + glu} \cdot \frac{glc}{K_{mglc7} + glc},$                                                                                                                                                     | (20) |

$$v_8 = v_{max,8} \cdot \frac{ile}{K_{mile8} + ile}, \quad (21)$$

$$v_9 = v_{max,9f} \cdot \frac{leu}{K_{mleu9} + leu} - v_{max,9r} \cdot \frac{glu}{K_{mglu9} + glu}, \quad (22)$$

$$v_{10} = v_{max,10} \cdot \frac{ser}{K_{mser10} + ser}, \quad (23)$$

$$v_{11} = v_{max,11f} \cdot \frac{pyr}{K_{mpyr11} + pyr} \cdot \frac{K_{iasn11}}{K_{iasn11} + asn} - v_{max,11r} \cdot \frac{glu}{K_{mglu11} + glu}, \quad (24)$$

## Model 2

$$\frac{dbiomass}{dt} = v_1 \cdot biomass - k_d \cdot biomass - D \cdot biomass, \quad (25)$$

$$\frac{dmAb}{dt} = v_2 - D \cdot mAb, \quad (26)$$

$$\frac{dpyr}{dt} = -2.918 \cdot v_1 + 2 \cdot v_3 - v_4 + v_{10} - 2 \cdot v_{11} + D \cdot (pyr_i - pyr), \quad (27)$$

$$\frac{dglc}{dt} = -0.355 \cdot v_1 - v_3 - v_7 - m \cdot biomass + D \cdot (glc_i - glc), \quad (28)$$

$$\frac{dlac}{dt} = v_4 + D \cdot (lac_i - lac), \quad (29)$$

$$\frac{dnh4}{dt} = -1.223 \cdot v_1 - 19.390 \cdot v_2 + v_5 + v_{10} + D \cdot (nh4_i - nh4), \quad (30)$$

$$\frac{dasn}{dt} = -0.260 \cdot v_1 - 3.970 \cdot v_2 - v_5 + D \cdot (asn_i - asn), \quad (31)$$

$$\frac{dasp}{dt} = -0.398 \cdot v_1 - 3.460 \cdot v_2 + v_5 - v_6 + D \cdot (asp_i - asp), \quad (32)$$

$$\frac{dglu}{dt} = -3.184 \cdot v_1 - 71.550 \cdot v_2 + v_6 + v_8 + v_9 + v_{11} + D \cdot (glu_i - glu), \quad (33)$$

$$\frac{dile}{dt} = -0.278 \cdot v_1 - 2.500 \cdot v_2 - v_8 + D \cdot (ile_i - ile), \quad (34)$$

$$\frac{dleu}{dt} = -0.540 \cdot v_1 - 7.660 \cdot v_2 - v_9 + D \cdot (leu_i - leu), \quad (35)$$

$$\frac{dser}{dt} = -1.515 \cdot v_1 - 24.500 \cdot v_2 + 2 \cdot v_7 - v_{10} + D \cdot (ser_i - ser), \quad (36)$$

$$\frac{dV}{dt} = F_{in} - F_{out} \quad (37)$$

$$v_1 = v_{max,1} \cdot \frac{pyr}{K_{mpyr1} + pyr} \cdot \frac{glu}{K_{mglu1} + glu} \cdot \frac{asn}{K_{masn1} + asn} \cdot \frac{glc}{K_{mglc1} + glc} \cdot \frac{K_{dlac1}}{K_{dlac1} + lac} \cdot \frac{K_{dnh41}}{K_{dnh41} + nh4}, \quad (38)$$

$$v_2 = a_2 \cdot biomass + b_2 \cdot v_1 \cdot biomass, \quad (39)$$

$$v_3 = v_{max,3} \cdot \frac{glc}{K_{mglc3} + glc} \cdot \frac{asn}{K_{masn3} + asn} + v_{3,base}, \quad (40)$$

$$v_4 = v_{max,4f} \cdot \frac{pyr}{K_{mpyr4} + pyr} \cdot \frac{1}{1 + \left(\frac{lac}{K_{ilac4}}\right)^{V_4}} - v_{max,4r} \cdot \frac{lac}{K_{mlac4} + lac} \cdot \frac{1}{v_3}, \quad (41)$$

$$v_5 = v_{max,5f} \cdot \frac{asn}{K_{masn5} + asn} - v_{max,5r} \cdot \frac{asp}{K_{masp5} + asp} \cdot \frac{nh4}{K_{mnh45} + nh4}, \quad (42)$$

$$v_6 = v_{max,6f} \cdot \frac{asp}{K_{masp6}+asp} - v_{max,6r} \cdot \frac{glu}{K_{mglu6}+glu'} \quad (43)$$

$$v_7 = v_{max,7} \cdot \frac{glc}{K_{mglc7}+glc'} \quad (44)$$

$$v_8 = v_{max,8} \cdot \frac{ile}{K_{mile8}+ile'} \quad (45)$$

$$v_9 = v_{max,9f} \cdot \frac{leu}{K_{mleu9}+leu} - v_{max,9r} \cdot \frac{glu}{K_{mglu9}+glu'} \quad (46)$$

$$v_{10} = v_{max,10} \cdot \frac{ser}{K_{mser10}+ser'} \quad (47)$$

$$v_{11} = v_{max,11f} \cdot \frac{pyr}{K_{mpyr11}+pyr} \cdot \frac{K_{iasn11}}{K_{iasn11}+asn'} \quad (48)$$

### Model 3

$$\frac{dbiomass}{dt} = v_1 \cdot biomass - k_d \cdot biomass - D \cdot biomass, \quad (49)$$

$$\frac{dAb}{dt} = v_2 - D \cdot Ab, \quad (50)$$

$$\frac{dpyr}{dt} = -2.918 \cdot v_1 + 2 \cdot v_3 - v_4 + v_{10} - 2 \cdot v_{11} + D \cdot (pyr_i - pyr), \quad (51)$$

$$\frac{dglc}{dt} = -0.355 \cdot v_1 - v_3 - v_7 - m \cdot biomass + D \cdot (glc_i - glc), \quad (52)$$

$$\frac{dlac}{dt} = v_4 - \frac{1}{Y_{lac}} \cdot biomass + D \cdot (lac_i - lac), \quad (53)$$

$$\frac{dnh4}{dt} = -1.223 \cdot v_1 - 19.390 \cdot v_2 + v_5 + v_{10} + D \cdot (nh4_i - nh4), \quad (54)$$

$$\frac{dasn}{dt} = -0.260 \cdot v_1 - 3.970 \cdot v_2 - v_5 + D \cdot (asn_i - asn), \quad (55)$$

$$\frac{dasp}{dt} = -0.398 \cdot v_1 - 3.460 \cdot v_2 + v_5 - v_6 + D \cdot (asp_i - asp), \quad (56)$$

$$\frac{dglu}{dt} = -3.184 \cdot v_1 - 71.550 \cdot v_2 + v_6 + v_8 + v_9 + v_{11} + D \cdot (glu_i - glu), \quad (57)$$

$$\frac{dile}{dt} = -0.278 \cdot v_1 - 2.500 \cdot v_2 - v_8 + D \cdot (ile_i - ile), \quad (58)$$

$$\frac{dleu}{dt} = -0.540 \cdot v_1 - 7.660 \cdot v_2 - v_9 + D \cdot (leu_i - leu), \quad (59)$$

$$\frac{dser}{dt} = -1.515 \cdot v_1 - 24.500 \cdot v_2 + 2 \cdot v_7 - v_{10} + D \cdot (ser_i - ser), \quad (60)$$

$$\frac{dV}{dt} = F_{in} - F_{out} \quad (61)$$

$$v_1 = v_{max,1} \cdot \frac{pyr}{K_{mpyr1}+pyr} \cdot \frac{glu}{K_{mglu1}+glu} \cdot \frac{asn}{K_{masn1}+asn} \cdot \frac{glc}{K_{mglc1}+glc} \cdot \frac{K_{dlac1}}{K_{dlac1}+lac} \cdot \frac{K_{dnh41}}{K_{dnh41}+nh4'} \quad (62)$$

$$v_2 = a_2 \cdot biomass + b_2 \cdot v_1 \cdot biomass, \quad (63)$$

$$v_3 = v_{max,3} \cdot \frac{glc}{K_{mglc3}+glc} \cdot \frac{asn}{K_{masn3}+asn} + v_{3,base'} \quad (64)$$

$$v_4 = v_{max,4f} \cdot \frac{pyr}{K_{mpyr4}+pyr} \cdot \frac{1}{1+\left(\frac{lac}{K_{ilac4}}\right)^{V_4}} - v_{max,4r} \cdot \frac{lac}{K_{mlac4}+lac} \cdot \frac{1}{v_3}, \quad (65)$$

$$v_5 = v_{max,5f} \cdot \frac{asn}{K_{masn5}+asn} - v_{max,5r} \cdot \frac{asp}{K_{masp5}+asp} \cdot \frac{nh4}{K_{mnh45}+nh4}, \quad (66)$$

$$v_6 = v_{max,6f} \cdot \frac{asp}{K_{masp6}+asp} - v_{max,6r} \cdot \frac{glu}{K_{mglu6}+glu'}, \quad (67)$$

$$v_7 = v_{max,7} \cdot \frac{glc}{K_{mglc7}+glc'}, \quad (68)$$

$$v_8 = v_{max,8} \cdot \frac{ile}{K_{mile8}+ile'}, \quad (69)$$

$$v_9 = v_{max,9f} \cdot \frac{leu}{K_{mleu9}+leu} - v_{max,9r} \cdot \frac{glu}{K_{mglu9}+glu'}, \quad (70)$$

$$v_{10} = v_{max,10} \cdot \frac{ser}{K_{mser10}+ser'}, \quad (71)$$

$$v_{11} = v_{max,11f} \cdot \frac{pyr}{K_{mpyr11}+pyr} \cdot \frac{K_{iasn11}}{K_{iasn11}+asn'}, \quad (72)$$


---
