# Supplementary material for: Deciphering Metabolic Pathways in High-Seeding-Density Fed-Batch Processes for Monoclonal Antibody Production: A Computational Modeling Perspective
Source: MDPI journal article supplement (doi:10.3390/bioengineering11040331), 2024-03-28
Supplement: s1 [file s1]

**Table S1.** List of reactions in the stoichiometric metabolic network.

| No.                                   | Reaction                                                                      |
|---------------------------------------|-------------------------------------------------------------------------------|
| <b>Glycolysis</b>                     |                                                                               |
| 1                                     | atp[c] + glc[c] -> adp[c] + g6p[c] + h[c]                                     |
| 2                                     | g6p[c] <=> f6p[c]                                                             |
| 3                                     | atp[c] + f6p[c] -> adp[c] + f16p[c] + h[c]                                    |
| 4                                     | f16p[c] <=> 2 g3p[c]                                                          |
| 5                                     | g3p[c] + adp[c] + p[c] + nad[c] <=> 3gp[c] + atp[c] + nadh[c] + h[c]          |
| 6                                     | 3gp[c] <=> h2o[c] + pep[c]                                                    |
| 7                                     | adp[c] + h[c] + pep[c] -> atp[c] + pyr[c]                                     |
| 8                                     | 2 h[c] + nadh[c] + pyr[c] <=> nad[c] + lac[c]                                 |
| 9                                     | gtp[c] + oaa[c] -> co2[c] + gdp[c] + pep[c]                                   |
| <b>Pentose phosphate pathway</b>      |                                                                               |
| 10                                    | 2 nadp[c] + h2o[c] + g6p[c] <=> 2 nadph[c] + 6pg[c] + h[c]                    |
| 11                                    | nadp[c] + 6pg[c] <=> nadph[c] + co2[c] + ri5p[c]                              |
| 12                                    | ri5p[c] <=> r5p[c]                                                            |
| 13                                    | ri5p[c] <=> x5p[c]                                                            |
| 14                                    | g3p[c] + s7p[c] <=> r5p[c] + x5p[c]                                           |
| 15                                    | x5p[c] + e4p[c] <=> g3p[c] + f6p[c]                                           |
| <b>Tricarboxylic Acid Cycle (TCA)</b> |                                                                               |
| 16                                    | succoa[c] + acetoac[c] <=> suc[c] + acetoaccoa[c]                             |
| 17                                    | gtp[m] + h2o[m] --> gdp[m] + p[m] + h[m]                                      |
| 18                                    | atp[m] + h2o[m] <=> adp[m] + p[m] + h[m]                                      |
| 19                                    | fadh2[m] + fad[c] <=> fad[m] + fadh2[c]                                       |
| 20                                    | pyr[m] + coa[m] + nad[m] --> accoa[m] + co2[m] + nadh[m]                      |
| 21                                    | mal[m] + nadp[m] -> pyr[m] + co2[m] + nadph[m]                                |
| 22                                    | pyr[m] + atp[m] + h2o[m] + co2[m] <=> oaa[m] + adp[m] + p[m]                  |
| 23                                    | accoa[m] + h2o[m] + oaa[m] <=> cit[m] + coa[m] + h[m]                         |
| 24                                    | cit[m] <=> isocit[m]                                                          |
| 25                                    | isocit[m] + nad[m] --> akg[m] + co2[m] + nadh[m]                              |
| 26                                    | akg[m] + coa[m] --> succoa[m] + co2[m] + h[m]                                 |
| 27                                    | gdp[m] + p[m] + succoa[m] <=> gtp[m] + suc[m] + coa[m]                        |
| 28                                    | suc[m] + fad[m] <=> fum[m] + fadh2[m]                                         |
| 29                                    | fum[m] + h2o[m] <=> mal[m]                                                    |
| 30                                    | mal[m] + nad[m] <=> oaa[m] + nadh[m] + h[m]                                   |
| 31                                    | nadph[m] <=> nadp[m] + h[m]                                                   |
| 32                                    | nadh[m] <=> nad[m] + h[m]                                                     |
| <b>Amino acid metabolism</b>          |                                                                               |
| 33                                    | nad[c] + 3gp[c] + glu[c] + h2o[c] <=> h[c] + nadh[c] + ser[c] + akg[c] + p[c] |
| 34                                    | ser[c] --> nh4[c] + pyr[c]                                                    |
| 35                                    | ser[c] <=> gly[c]                                                             |
| 36                                    | cys[c] + h2o[c] + nad[c] <=> pyr[c] + nh4[c] + nadh[c] + h[c]                 |
| 37                                    | pyr[c] + glu[c] <=> ala[c] + akg[c]                                           |
| 38                                    | h[c] + oaa[c] <=> co2[c] + pyr[c]                                             |
| 39                                    | mal[c] + nad[c] <=> oaa[c] + nadh[c] + h[c]                                   |
| 40                                    | coa[c] + atp[c] + cit[c] -> accoa[c] + adp[c] + p[c] + oaa[c]                 |
| 41                                    | fum[c] + h2o[c] <=> mal[c]                                                    |
| 42                                    | nad[c] + mal[c] -> nadh[c] + co2[c] + pyr[c]                                  |

43 atp[c] + propcoa[c] + hco3[c] <=> adp[c] + succoa[c] + p[c] + h[c]  
 44 akg[c] + val[c] + 3 nad[c] + o2[c] + fad[c] + coa[c] + 2 h[c] <=> glu[c] + propcoa[c] + 2 co2[c] + 3  
 nadh[c] + fadh2[c]  
 45 thr[c] --> akbut[c] + nh4[c]  
 46 ser[c] + met[c] + atp[c] + 2 o2[c] + h[c] <=> cys[c] + akbut[c] + nh4[c] + amp[c] + pp[c] + co2[c] +  
 h2o[c]  
 47 akg[c] + ile[c] + 2 nad[c] + fad[c] + 2 coa[c] + h[c] -> glu[c] + propcoa[c] + co2[c] + 2 nadh[c] +  
 fadh2[c] + accoa[c]  
 48 akbut[c] + coa[c] + nad[c] <=> propcoa[c] + co2[c] + nadh[c]  
 49 phe[c] + nadh[c] + o2[c] + h[c] -> tyr[c] + nad[c] + h2o[c]  
 50 akg[c] + tyr[c] + h2o[c] + 2 o2[c] <=> fum[c] + glu[c] + acetoac[c] + co2[c] + 2 h[c]  
 51 akg[c] + leu[c] + atp[c] + nad[c] + fad[c] + hco3[c] + coa[c] <=> glu[c] + acetoac[c] + accoa[c] +  
 adp[c] + nadh[c] + fadh2[c] + p[c] + co2[c]  
 52 thr[c] + coa[c] + nad[c] <=> accoa[c] + nadh[c] + h[c] + gly [c]  
 53 lys[c] + 2 akg[c] + nad[c] + h2o[c] + fad[c] <=> aoxo[c] + 2 glu[c] + nadh[c] + fadh2[c]  
 54 trp[c] + 3 h2o[c] + 3 o2[c] <=> ala[c] + co2[c] + aoxo[c] + nh4[c] + for[c]  
 55 aoxo[c] + coa[c] + 2 nad[c] + h2o[c] <=> acetoaccoa[c] + 2 nadh[c] + 2 co2[c] + 2 h[c]  
 56 acetoaccoa[c] + coa[c] <=> 2 accoa[c]  
 57 asp[c] + akg[c] <=> oaa[c] + glu[c]  
 58 asn[c] + h2o[c] --> asp[c] + nh4[c]  
 59 nh4[c] + atp[c] + glu[c] -> h[c] + adp[c] + p[c] + gln[c]  
 60 gln[c] + h2o[c] --> glu[c] + nh4[c]  
 61 gluysa[c] + nad[c] + h2o[c] --> glu[c] + nadh[c] + 2 h[c]  
 62 orn[c] + akg[c] --> gluysa[c] + glu[c]  
 63 arg[c] + h2o[c] --> orn[c] + urea[c]  
 64 pro[c] + nad[c] + h2o[c] --> gluysa[c] + h[c] + nadh[c]  
 65 his[c] + 4 h2o[c] <=> glu[c] + 2 nh4[c] + for[c]  
 66 glu[c] + nad[c] <=> akg[c] + nh4[c] + nadh[c] + h[c]  
 67 atp[c] + asp[c] + gln[c] + h2o[c] <=> amp[c] + asn[c] + glu[c] + pp[c] + h[c]  
 68 ser[c] + hocys[c] <=> cys[c] + nh4[c] + akbut[c]  
 69 asp[m] + akg[m] <=> oaa[m] + glu[m]  
 70 glu[m] + nad[m] + h2o[m] <=> akg[m] + nh4[m] + nadh[m] + h[m]

---

#### Transport reactions

|    |                         |     |                         |
|----|-------------------------|-----|-------------------------|
| 71 | succoa[m] <=> succoa[c] | 115 | suc[c] <=> suc[ext]     |
| 72 | co2[m] <=> co2[c]       | 116 | mal[c] <=> mal[ext]     |
| 73 | nh4[m] <=> nh4[c]       | 117 | accoa[c] <=> accoa[ext] |
| 74 | asp[m] <=> asp[c]       | 118 | lys[ext] <=>            |
| 75 | akg[m] <=> akg[c]       | 119 | trp[ext] <=>            |
| 76 | cit[m] <=> cit[c]       | 120 | tyr[ext] <=>            |
| 77 | accoa[m] <=> accoa[c]   | 121 | phe[ext] <=>            |
| 78 | suc[m] <=> suc[c]       | 122 | asp[ext] <=>            |
| 79 | mal[m] <=> mal[c]       | 123 | leu[ext] <=>            |
| 80 | pyr[m] <=> pyr[c]       | 124 | asn[ext] <=>            |
| 81 | for[c] <=> for[ext]     | 125 | gln[ext] <=>            |

|     |                         |     |                            |
|-----|-------------------------|-----|----------------------------|
| 82  | pyr[c] <=> pyr[ext]     | 126 | glu[ext] <=>               |
| 83  | lys[c] <=> lys[ext]     | 127 | his[ext] <=>               |
| 84  | trp[c] <=> trp[ext]     | 128 | pro[ext] <=>               |
| 85  | tyr[c] <=> tyr[ext]     | 129 | arg[ext] <=>               |
| 86  | phe[c] <=> phe[ext]     | 130 | ile[ext] <=>               |
| 87  | asp[c] <=> asp[ext]     | 131 | val[ext] <=>               |
| 88  | leu[c] <=> leu[ext]     | 132 | met[ext] <=>               |
| 89  | asn[c] <=> asn[ext]     | 133 | thr[ext] <=>               |
| 90  | gln[c] <=> gln[ext]     | 134 | cys[ext] <=>               |
| 91  | glu[c] <=> glu[ext]     | 135 | ser[ext] <=>               |
| 92  | his[c] <=> his[ext]     | 136 | ala[ext] <=>               |
| 93  | pro[c] <=> pro[ext]     | 137 | nh4[ext] <=>               |
| 94  | arg[c] <=> arg[ext]     | 138 | co2[ext] <=>               |
| 95  | ile[c] <=> ile[ext]     | 139 | gly[ext] <=>               |
| 96  | val[c] <=> val[ext]     | 140 | hocys[ext] -->             |
| 97  | met[c] <=> met[ext]     | 141 | lac[ext] <=>               |
| 98  | cit[c] <=> cit[ext]     | 142 | glc[ext] <=>               |
| 99  | thr[c] <=> thr[ext]     | 143 | s7p[ext] <=>               |
| 100 | cys[c] <=> cys[ext]     | 144 | urea[ext] <=>              |
| 101 | ser[c] <=> ser[ext]     | 145 | e4p[ext] <=>               |
| 102 | ala[c] <=> ala[ext]     | 146 | o2[ext] <=>                |
| 103 | nh4[c] <=> nh4[ext]     | 147 | cit[ext] <=>               |
| 104 | co2[c] <=> co2[ext]     | 148 | for[ext] -->               |
| 105 | gly[c] <=> gly[ext]     | 149 | pyr[ext] <=>               |
| 106 | glc[c] <=> glc[ext]     | 150 | ri5p[ext] -->              |
| 107 | hocys[c] <=> hocys[ext] | 151 | suc[ext] <=>               |
| 108 | s7p[c] <=> s7p[ext]     | 152 | accoa[ext] <=>             |
| 109 | urea[c] <=> urea[ext]   | 153 | mal[ext] <=>               |
| 110 | e4p[c] <=> e4p[ext]     | 154 | biomass[c] -> biomass[ext] |
| 111 | lac[c] <=> lac[ext]     | 155 | biomass[ext] -->           |
| 112 | o2[c] <=> o2[ext]       | 156 | mAb[ext] ->                |

|     |                                                                                                                         |     |                                                                  |
|-----|-------------------------------------------------------------------------------------------------------------------------|-----|------------------------------------------------------------------|
| 113 | $\text{hco}_3[\text{c}] + \text{h}[\text{c}] \rightleftharpoons \text{h}_2\text{o}[\text{c}] + \text{co}_2[\text{ext}]$ | 157 | $\text{fum}[\text{c}] \rightleftharpoons \text{fum}[\text{ext}]$ |
| 114 | $\text{ri5p}[\text{c}] \rightleftharpoons \text{ri5p}[\text{ext}]$                                                      | 158 | $\text{fum}[\text{ext}] \rightleftharpoons$                      |

---

#### Energy maintenance

|     |                                                                                                                                         |
|-----|-----------------------------------------------------------------------------------------------------------------------------------------|
| 159 | $\text{h}_2\text{o}[\text{c}] + \text{atp}[\text{c}] \rightarrow \text{h}[\text{c}] + \text{adp}[\text{c}] + \text{p}[\text{c}]$        |
| 160 | $\text{gtp}[\text{c}] + \text{h}_2\text{o}[\text{c}] \rightleftharpoons \text{gdp}[\text{c}] + \text{p}[\text{c}] + \text{h}[\text{c}]$ |

---

#### Biomass formation

|     |                                                                                                                                                                                                                                                                                                                                                                                                                                                                                                                                                                                                                                                                                                                                                                                                                                                                                                                                                                                                                                                                                                                                                          |
|-----|----------------------------------------------------------------------------------------------------------------------------------------------------------------------------------------------------------------------------------------------------------------------------------------------------------------------------------------------------------------------------------------------------------------------------------------------------------------------------------------------------------------------------------------------------------------------------------------------------------------------------------------------------------------------------------------------------------------------------------------------------------------------------------------------------------------------------------------------------------------------------------------------------------------------------------------------------------------------------------------------------------------------------------------------------------------------------------------------------------------------------------------------------------|
| 161 | $0.282 \text{ g6p}[\text{c}] + 0.073 \text{ r5p}[\text{c}] + 1.15 \text{ o}_2[\text{c}] + 4.02 \text{ nadph}[\text{c}] + 2.08 \text{ accoa}[\text{c}] + 0.28 \text{ pro}[\text{c}] + 23 \text{ h}_2\text{o}[\text{c}] + 32.258 \text{ atp}[\text{c}] + 0.19 \text{ met}[\text{c}] + 0.66 \text{ gly}[\text{c}] + 0.236 \text{ phe}[\text{c}] + 0.27 \text{ glu}[\text{c}] + 0.568 \text{ ala}[\text{c}] + 0.26 \text{ asn}[\text{c}] + 0.105 \text{ cys}[\text{c}] + 0.558 \text{ gln}[\text{c}] + 0.43 \text{ ser}[\text{c}] + 0.32 \text{ thr}[\text{c}] + 0.31 \text{ arg}[\text{c}] + 0.398 \text{ asp}[\text{c}] + 0.12 \text{ his}[\text{c}] + 0.54 \text{ leu}[\text{c}] + 0.278 \text{ ile}[\text{c}] + 0.49 \text{ lys}[\text{c}] + 0.41 \text{ val}[\text{c}] + 0.0318 \text{ trp}[\text{c}] + 0.16 \text{ tyr}[\text{c}] \rightarrow \text{biomass}[\text{c}] + 28.063 \text{ h}[\text{c}] + 31.961 \text{ adp}[\text{c}] + 31.961 \text{ p}[\text{c}] + 0.297 \text{ pp}[\text{c}] + 4.02 \text{ nadp}[\text{c}] + 1.97 \text{ coa}[\text{c}] + 0.19 \text{ co}_2[\text{c}] + 0.297 \text{ amp}[\text{c}] + 0.06059 \text{ hocys}[\text{c}]$ |
|-----|----------------------------------------------------------------------------------------------------------------------------------------------------------------------------------------------------------------------------------------------------------------------------------------------------------------------------------------------------------------------------------------------------------------------------------------------------------------------------------------------------------------------------------------------------------------------------------------------------------------------------------------------------------------------------------------------------------------------------------------------------------------------------------------------------------------------------------------------------------------------------------------------------------------------------------------------------------------------------------------------------------------------------------------------------------------------------------------------------------------------------------------------------------|

---

#### Protein synthesis

|     |                                                                                                                                                                                                                                                                                                                                                                                                                                                                                                                                                                                                                                       |
|-----|---------------------------------------------------------------------------------------------------------------------------------------------------------------------------------------------------------------------------------------------------------------------------------------------------------------------------------------------------------------------------------------------------------------------------------------------------------------------------------------------------------------------------------------------------------------------------------------------------------------------------------------|
| 162 | $5.68 \text{ ala}[\text{c}] + 7.99 \text{ arg}[\text{c}] + 6.68 \text{ asn}[\text{c}] + 10.79 \text{ asp}[\text{c}] + 6.09 \text{ cys}[\text{c}] + 3.92 \text{ glu}[\text{c}] + 4.83 \text{ gln}[\text{c}] + 7.32 \text{ gly}[\text{c}] + 5.09 \text{ his}[\text{c}] + 2.09 \text{ ile}[\text{c}] + 7.04 \text{ leu}[\text{c}] + 7.30 \text{ lys}[\text{c}] + 3.99 \text{ met}[\text{c}] + 4.37 \text{ phe}[\text{c}] + 1.88 \text{ pro}[\text{c}] + 2.49 \text{ ser}[\text{c}] + 3.17 \text{ thr}[\text{c}] + 1.03 \text{ trp}[\text{c}] + 4.51 \text{ tyr}[\text{c}] + 3.76 \text{ val}[\text{c}] \rightarrow \text{mAb}[\text{c}]$ |
|-----|---------------------------------------------------------------------------------------------------------------------------------------------------------------------------------------------------------------------------------------------------------------------------------------------------------------------------------------------------------------------------------------------------------------------------------------------------------------------------------------------------------------------------------------------------------------------------------------------------------------------------------------|

---

\* [c] indicates metabolites in the cytosol, [ext] indicates extracellular metabolites
