# Supplementary material for: Deciphering Metabolic Pathways in High-Seeding-Density Fed-Batch Processes for Monoclonal Antibody Production: A Computational Modeling Perspective
Source: MDPI journal article supplement (doi:10.3390/bioengineering11040331), 2024-03-28
Supplement: s1 [file s1]

**Table S2.** List of abbreviations of metabolites in the models.

| Abbreviation | Metabolite                                                 | Abbreviation | Metabolite                                                           |
|--------------|------------------------------------------------------------|--------------|----------------------------------------------------------------------|
| 3gp          | 3-phosphoglyceric acid                                     | 6pg          | 6-phosphogluconate                                                   |
| accoa        | acetyl-CoA                                                 | acetoac      | acetoacetate                                                         |
| acetoaccoa   | acetoacetyl-CoA                                            | adp          | adenosine diphosphate                                                |
| akbut        | alpha-ketobutyrate                                         | akg          | alpha-ketoglutarate                                                  |
| ala          | alanine                                                    | amp          | adenosine monophosphate                                              |
| aoxo         |                                                            | arg          | arginine                                                             |
| asn          | asparagine                                                 | asp          | aspartate                                                            |
| atp          | adenosine triphosphate                                     | cit          | citrate                                                              |
| co2          | carbon dioxide                                             | coa          | Co-enzyme A                                                          |
| cys          | cysteine                                                   | e4p          | erythrose-4-phosphate                                                |
| f16p         | fructose-1,6-bisphosphate                                  | f6p          | fructose-6-phosphate                                                 |
| fad/fadh2    | Flavin adenine dinucleotide<br>(oxidized/reduced)          | for          | formate                                                              |
| fum          | fumarate                                                   | g3p          | glyceraldehyde-3-<br>phosphate                                       |
| g6p          | glucose-6-phosphate                                        | gdp          | guanosine diphosphate                                                |
| glc          | glucose                                                    | gln          | glutamine                                                            |
| gtp          | guanosine triphosphate                                     | glu          | glutamate                                                            |
| gluysa       | glutamate semialdehyde                                     | gly          | glycerine                                                            |
| h            | proton                                                     | h2o          | water                                                                |
| his          | histidine                                                  | hocys        | homocysteine                                                         |
| ile          | isoleucine                                                 | isocit       | isocitrate                                                           |
| lac          | lactate                                                    | lys          | lysine                                                               |
| mal          | malate                                                     | met          | methionine                                                           |
| nad/nadh     | nicotinamide adenine<br>dinucleotide<br>(oxidized/reduced) | nadp/nadph   | nicotinamide adenine<br>dinucleotide phosphate<br>(oxidized/reduced) |
| nh4          | ammonia                                                    | o2           | oxygen                                                               |
| oaa          | oxaloacetate                                               | orn          | ornithine                                                            |
| p/pp         | phosphate                                                  | pep          | phosphoenolpyruvate                                                  |
| phe          | phenylalanine                                              | pro          | proline                                                              |
| propcoa      | propionyl-CoA                                              | pyr          | pyruvate                                                             |
| r5p          | ribose-5-phosphate                                         | ri5p         | ribulose-5-phosphate                                                 |
| s7p          | sedoheptulose-7-phosphate                                  | ser          | serine                                                               |
| suc          | succinate                                                  | succoa       | succinyl-CoA                                                         |
| thr          | threonine                                                  | tyr          | tyrosine                                                             |
| val          | valine                                                     | x5p          | xylulose-5-phosphate                                                 |

\* Tables may have a footer.
