# Supplementary material for: Deciphering Metabolic Pathways in High-Seeding-Density Fed-Batch Processes for Monoclonal Antibody Production: A Computational Modeling Perspective
Source: MDPI journal article supplement (doi:10.3390/bioengineering11040331), 2024-03-28
Supplement: s1 [file s1]

**Table S3.** List of reactions in the kinetic central carbon models.

| No. | Model 1                                                                                                                   | Model 2/3                                                                                                                 |
|-----|---------------------------------------------------------------------------------------------------------------------------|---------------------------------------------------------------------------------------------------------------------------|
| 1   | 0.355 glc + 2.534 pyr + 2.834 glu + 0.260 asn +<br>1.600 ser + 0.398 asp + 0.540 leu + 0.278 ile + 1.384<br>nh4 → biomass | 0.355 glc + 2.918 pyr + 3.184 glu + 0.260 asn +<br>1.515 ser + 0.398 asp + 0.540 leu + 0.278 ile + 1.223<br>nh4 → biomass |
| 2   | 8.560 pyr + 62.060 glu + 3.970 asn + 3.460 asp +<br>2.500 ile + 7.660 leu + 23.260 ser + 22.890 nh4 →<br>mAb              | 71.550 glu + 3.970 asn + 3.460 asp + 2.500 ile +<br>7.660 leu + 24.500 ser + 19.390 nh4 → mAb                             |
| 3   | glc → 2 pyr                                                                                                               | glc → 2 pyr                                                                                                               |
| 4   | pyr ↔ lac                                                                                                                 | pyr ↔ lac                                                                                                                 |
| 5   | asn ↔ asp + nh4                                                                                                           | asn ↔ asp + nh4                                                                                                           |
| 6   | asp ↔ glu                                                                                                                 | asp ↔ glu                                                                                                                 |
| 7   | 2 glu + glc → 2 ser                                                                                                       | glc → 2 ser                                                                                                               |
| 8   | ile → glu                                                                                                                 | ile → glu                                                                                                                 |
| 9   | leu ↔ glu                                                                                                                 | leu ↔ glu                                                                                                                 |
| 10  | ser → nh4 + pyr                                                                                                           | ser → nh4 + pyr                                                                                                           |
| 11  | pyr ↔ glu                                                                                                                 | 2 pyr → glu                                                                                                               |
