# Supplementary material for: Deciphering Metabolic Pathways in High-Seeding-Density Fed-Batch Processes for Monoclonal Antibody Production: A Computational Modeling Perspective
Source: MDPI journal article supplement (doi:10.3390/bioengineering11040331), 2024-03-28
Supplement: s1 [file s1]

**Table S5.** List of nominal and optimized kinetic parameters with reference value and boundaries.

| Parameter         | Nominal               | Ref.          | Bounds                           | Optimized model 1     | Optimized model 2     | Optimized model 3     |
|-------------------|-----------------------|---------------|----------------------------------|-----------------------|-----------------------|-----------------------|
| $v_{max,1}$       | $7.000 \cdot 10^{-2}$ | exp.,<br>[33] | 10 % - 5 %                       | $9.840 \cdot 10^{-2}$ | $1.185 \cdot 10^{-1}$ | $1.117 \cdot 10^{-1}$ |
| $v_{max,3}$       | $7.000 \cdot 10^{-1}$ | exp.          | 10 % - 5 % (only<br>upper bound) | $1.014 \cdot 10^0$    | $5.082 \cdot 10^{-1}$ | $8.679 \cdot 10^{-1}$ |
| $v_{max,4f}$      | $7.000 \cdot 10^{-1}$ | exp.          | 50 % - 25 %                      | $1.067 \cdot 10^0$    | $8.698 \cdot 10^{-1}$ | $7.554 \cdot 10^{-1}$ |
| $v_{max,4r}$      | $2.000 \cdot 10^{-1}$ | exp.          | 50 % - 25 %                      | $1.897 \cdot 10^{-1}$ | $2.987 \cdot 10^{-1}$ | $8.570 \cdot 10^{-2}$ |
| $v_{max,5f}$      | $1.900 \cdot 10^{-1}$ | exp.          | 50 % - 25 %                      | $2.363 \cdot 10^{-1}$ | $2.029 \cdot 10^{-1}$ | $2.210 \cdot 10^{-1}$ |
| $v_{max,5r}$      | $1.000 \cdot 10^{-3}$ | exp.          | 50 % - 25 %                      | $1.098 \cdot 10^{-5}$ | $3.656 \cdot 10^{-5}$ | $2.150 \cdot 10^{-2}$ |
| $v_{max,6f}$      | $7.800 \cdot 10^{-1}$ | [12]          | 75 % - 50 %                      | $2.356 \cdot 10^{-1}$ | $1.249 \cdot 10^0$    | $1.579 \cdot 10^0$    |
| $v_{max,6r}$      | $1.000 \cdot 10^{-3}$ | arb.          | 75 % - 50 %                      | $1.962 \cdot 10^{-1}$ | $3.306 \cdot 10^{-1}$ | $1.695 \cdot 10^{-1}$ |
| $v_{max,7}$       | $7.000 \cdot 10^{-1}$ | exp.          | 10 % - 5 %                       | $9.370 \cdot 10^{-2}$ | $2.137 \cdot 10^{-1}$ | $9.890 \cdot 10^{-2}$ |
| $v_{max,8}$       | $2.000 \cdot 10^{-2}$ | arb.          | 50 % - 25 %                      | $5.100 \cdot 10^{-3}$ | $2.100 \cdot 10^{-3}$ | $9.800 \cdot 10^{-3}$ |
| $v_{max,9f}$      | $4.800 \cdot 10^{-2}$ | arb.          | 50 % - 25 %                      | $2.690 \cdot 10^{-2}$ | $2.220 \cdot 10^{-2}$ | $2.670 \cdot 10^{-2}$ |
| $v_{max,9r}$      | $1.000 \cdot 10^{-3}$ | arb.          | 75 % - 50 %                      | $8.287 \cdot 10^{-5}$ | $1.326 \cdot 10^{-4}$ | $3.489 \cdot 10^{-4}$ |
| $v_{max,10}$      | $8.500 \cdot 10^{-1}$ | [12]          | 75 % - 50 %                      | $9.909 \cdot 10^{-1}$ | $7.040 \cdot 10^{-2}$ | $7.420 \cdot 10^{-2}$ |
| $v_{max,11f}$     | $3.900 \cdot 10^{-1}$ | [12]          | 75 % - 50 %                      | $5.372 \cdot 10^{-1}$ | $4.674 \cdot 10^{-1}$ | $5.078 \cdot 10^{-1}$ |
| $v_{max,11r}$     | $1.300 \cdot 10^{-1}$ | arb.          | 75 % - 50 %                      | $2.147 \cdot 10^{-1}$ |                       |                       |
| $K_{mpyr1}$       | $3.900 \cdot 10^{-2}$ | [12]          | 75 % - 50 %                      | $8.290 \cdot 10^{-2}$ | $7.300 \cdot 10^{-3}$ | $8.000 \cdot 10^{-3}$ |
| $K_{mglu1}$       | $1.700 \cdot 10^{-2}$ | [12]          | 75 % - 50 %                      | $3.717 \cdot 10^{-4}$ | $7.994 \cdot 10^{-1}$ | $7.562 \cdot 10^{-1}$ |
| $K_{mglc1}$       | $7.500 \cdot 10^{-1}$ | [33]          | 75 % - 50 %                      | $1.084 \cdot 10^{-1}$ | $9.030 \cdot 10^{-2}$ | $1.269 \cdot 10^{-1}$ |
| $K_{masn1}$       | $4.200 \cdot 10^{-3}$ | [12]          | 75 % - 50 %                      | $2.984 \cdot 10^{-5}$ | $1.180 \cdot 10^{-2}$ | $1.600 \cdot 10^{-3}$ |
| $K_{dnh41}$       | $1.500 \cdot 10^{+1}$ | [33]          | 75 % - 50 %                      | $3.450 \cdot 10^{+2}$ | $3.449 \cdot 10^{+1}$ | $2.843 \cdot 10^{+1}$ |
| $K_{dlac1}$       | $9.000 \cdot 10^{+1}$ | [33]          | 75 % - 50 %                      | $1.171 \cdot 10^{+3}$ |                       |                       |
| $K_{mglc3}$       | $1.100 \cdot 10^{-1}$ | [32]          | 75 % - 50 %                      | $7.400 \cdot 10^{-3}$ | $1.700 \cdot 10^{-3}$ | $4.600 \cdot 10^{-3}$ |
| $K_{masn3}$       | $4.000 \cdot 10^0$    |               | 75 % - 50 %                      | $4.463 \cdot 10^0$    | $1.507 \cdot 10^0$    | $2.965 \cdot 10^0$    |
| $K_{mpyr4}$       | $3.000 \cdot 10^{-2}$ | [32]          | 75 % - 50 %                      | $2.065 \cdot 10^{-4}$ | $2.800 \cdot 10^{-3}$ | $2.910 \cdot 10^{-1}$ |
| $K_{mlac4}$       | $1.790 \cdot 10^0$    | [32]          | 75 % - 50 %                      | $1.809 \cdot 10^{-1}$ | $2.457 \cdot 10^0$    | $5.473 \cdot 10^{-1}$ |
| $K_{ilac4}$       | $2.000 \cdot 10^{+1}$ |               | 75 % - 50 %                      | $3.491 \cdot 10^{+1}$ | $6.268 \cdot 10^0$    | $1.613 \cdot 10^{+1}$ |
| $K_{masn5}$       | $2.240 \cdot 10^0$    | [34]*         | 75 % - 50 %                      | $9.946 \cdot 10^{-1}$ | $6.989 \cdot 10^{-1}$ | $6.893 \cdot 10^{-1}$ |
| $K_{masp5}$       | $4.000 \cdot 10^{-2}$ | [12]          | 75 % - 50 %                      | $1.800 \cdot 10^{-2}$ | $3.350 \cdot 10^{-2}$ | $5.300 \cdot 10^{-2}$ |
| $K_{mnh45}$       | $1.100 \cdot 10^0$    | [12]          | 75 % - 50 %                      | $8.172 \cdot 10^{-1}$ | $2.050 \cdot 10^0$    | $2.632 \cdot 10^0$    |
| $K_{masp6}$       | $5.000 \cdot 10^{-1}$ | [35]*         | 75 % - 50 %                      | $1.336 \cdot 10^0$    | $2.996 \cdot 10^0$    | $7.696 \cdot 10^0$    |
| $K_{mglu6}$       | $7.500 \cdot 10^{-1}$ | [12]          | 75 % - 50 %                      | $1.955 \cdot 10^0$    | $3.700 \cdot 10^{-2}$ | $5.000 \cdot 10^{-3}$ |
| $K_{mglu7}$       | $7.500 \cdot 10^{-1}$ | [12]          | 75 % - 50 %                      | $2.439 \cdot 10^{-1}$ |                       |                       |
| $K_{mglc7}$       | $2.000 \cdot 10^{+1}$ | [12]          | 75 % - 50 %                      | $4.737 \cdot 10^0$    | $7.417 \cdot 10^{+1}$ | $3.776 \cdot 10^{+1}$ |
| $K_{mile8}$       | $2.220 \cdot 10^{+1}$ | [36]*         | 75 % - 50 %                      | $6.862 \cdot 10^0$    | $5.027 \cdot 10^0$    | $5.611 \cdot 10^0$    |
| $K_{mleu9}$       | $1.110 \cdot 10^{+1}$ | [36]*         | 75 % - 50 %                      | $1.496 \cdot 10^0$    | $7.041 \cdot 10^{-1}$ | $1.948 \cdot 10^{-1}$ |
| $K_{mglu9}$       | $6.650 \cdot 10^0$    | [37]*         | 75 % - 50 %                      | $1.273 \cdot 10^0$    | $5.398 \cdot 10^0$    | $1.578 \cdot 10^0$    |
| $K_{mser10}$      | $4.500 \cdot 10^{+1}$ | [38]*         | 75 % - 50 %                      | $1.203 \cdot 10^{+2}$ | $5.354 \cdot 10^0$    | $1.364 \cdot 10^{+1}$ |
| $k_d$             | $4.500 \cdot 10^{-2}$ | [33]          | 75 % - 50 %                      | $6.830 \cdot 10^{-2}$ | $7.300 \cdot 10^{-2}$ | $6.360 \cdot 10^{-2}$ |
| $m_{glc}$         | $1.780 \cdot 10^{-1}$ | [33]          | 75 % - 50 %                      | $4.250 \cdot 10^{-2}$ | $3.380 \cdot 10^{-2}$ | $4.130 \cdot 10^{-2}$ |
| $K_{mpyr11}$      | $3.900 \cdot 10^{-2}$ | [12]          | 75 % - 50 %                      | $2.803 \cdot 10^{-4}$ | $2.346 \cdot 10^{-1}$ | $2.986 \cdot 10^{-1}$ |
| $K_{iasn11}$      | $4.000 \cdot 10^0$    |               | 75 % - 50 %                      | $2.338 \cdot 10^0$    | $2.569 \cdot 10^{+1}$ | $5.383 \cdot 10^0$    |
| $a_2$             | $1.000 \cdot 10^{-4}$ |               | 75 % - 50 %                      | $1.772 \cdot 10^{-4}$ | $1.847 \cdot 10^{-4}$ | $1.834 \cdot 10^{-4}$ |
| $b_2$             | $3.000 \cdot 10^{-3}$ |               | 75 % - 50 %                      | $1.289 \cdot 10^{-6}$ | $1.879 \cdot 10^{-5}$ | $4.804 \cdot 10^{-5}$ |
| $\gamma_4$        | $3.000 \cdot 10^0$    |               | 75 % - 50 %                      | $4.006 \cdot 10^0$    | $4.544 \cdot 10^{-1}$ | $3.710 \cdot 10^0$    |
| $v_{3,base}$      | $1.000 \cdot 10^{-1}$ |               | 75 % - 50 %                      | $4.010 \cdot 10^{-2}$ | $1.345 \cdot 10^{-1}$ | $6.190 \cdot 10^{-2}$ |
| $Y_{lac/biomass}$ | $1.670 \cdot 10^{+1}$ |               | 75 % - 50 %                      |                       |                       | $3.233 \cdot 10^{+2}$ |

\* Kinetic parameters found on BRENDA originate from data for the species *Rattus norvegicus* or *Cavia porcellus* since no data was available for *Cricetulus griseus* (Chinese hamster); BRENDA is available at [www.brenda-enzymes.org](http://www.brenda-enzymes.org);  
exp. = observed maximal fluxes, arb. = arbitrary values
