# Supplementary material for: Deciphering Metabolic Pathways in High-Seeding-Density Fed-Batch Processes for Monoclonal Antibody Production: A Computational Modeling Perspective
Source: Bioengineering (Basel). 2024 Mar 28;11(4):331. doi: 10.3390/bioengineering11040331 (PMC11048072; doi:10.3390/bioengineering11040331)
Supplement: Supplementary file 1 [file bioengineering-11-00331-s001.zip]

Archive with 9 entries (9 files):
- bioengineering-2908446-Table S5.pdf
- Supporting Material Figure S1.pdf
- Supporting Material Figure S2.pdf
- Supporting Material Figure S3.pdf
- Supporting Material Figure S4.pdf
- Supporting Material S1.pdf
- Supporting Material S2.pdf
- Supporting Material S3.pdf
- Supporting Material S4.pdf
