# Supplementary figures and images for: Deciphering Metabolic Pathways in High-Seeding-Density Fed-Batch Processes for Monoclonal Antibody Production: A Computational Modeling Perspective
Source: MDPI journal article supplement (doi:10.3390/bioengineering11040331), 2024-03-28

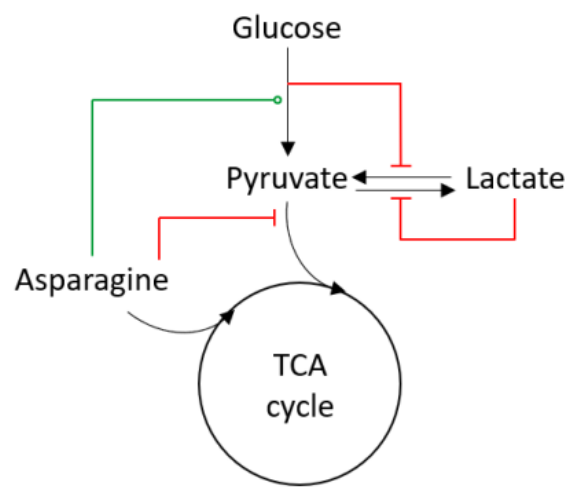

**Figure S2.** Visualization of the regulations behind the lactate shift in the dynamic model.

Supplement: s1 [file s1]
